# Supplementary material for: Serum MicroRNAs as Biomarkers of Sepsis and Resuscitation
Source: MDPI journal article supplement (doi:10.3390/app112311549), 2021-12-06
Supplement: s1 [file s1]

# **Serum microRNAs as Biomarkers of Sepsis and Resuscitation**

## **SUPPLEMENTARY MATERIALS**

### **INTRODUCTION**

Commonly used biomarkers for the diagnosis of sepsis and to monitor the response to therapy are C-reactive protein (CRP), procalcitonin (PCT) and interleukin (IL)-6. CRP is an acute phase protein produced in the liver upon IL-6 stimulation. It is related to the severity of infection and is sensitive to the response to therapy (32). However, it is not specific for infection as is elevated in other inflammatory conditions without sepsis, such as burns (33). PCT is a prohormone of calcitonin synthesized and secreted by neuroendocrine cells in the thyroid gland, and from other tissues under conditions of infection. PCT is more sensitive and specific than CRP for the diagnosis of bacterial infections, and is useful to guide antibiotic therapy in septic patients (34). IL-6 is released after stimulation of the innate immune cells and activates the synthesis of acute phase proteins. It is useful as a prognostic biomarker of sepsis but it is elevated nonspecifically in other conditions such as trauma or surgery (35), therefore lacking specificity for sepsis. In this context, many different molecules have been proposed as biomarkers for the diagnosis of sepsis (36).

Micro RNAs (miRNAs) are critically involved in the innate and adaptive immunity in various conditions including atherosclerosis, immunological disorders, diabetes, and bacterial infection (37). The role of miRNAs in sepsis is supported by experimental studies showing (i) that certain miRNAs are mediators of the effects observed after a septic challenge; or (ii) that key genes in the pathophysiology of sepsis are regulated by certain miRNAs. For instance, lipopolysaccharide (LPS) and tumor necrosis factor (TNF)- $\alpha$  upregulate miR-155 expression in macrophages and liver, and treatment with TNF- $\alpha$  induces a more severe disease in miR-155 transgenic mice (38). Reciprocally, miRNAs regulate the expression of several messenger RNAs encoding for components of the Toll-like receptor (TLR) signaling which mediates the response to LPS. For instance, miR-146a regulates TLR4 expression in the human monocytic cell line THP-1 (39).

### **METHODS**

#### **Animal preparation and monitoring**

We followed the current European and National legislation on the use of laboratory animals (Principles of Laboratory Animal Care, 2010/63/UE and Real Decreto 53/2013 BOE-08/02).

We used stored blood and renal tissue samples obtained in a previous study on the circulatory effects of shock resuscitation. Intact pigs (*Sus scrofa domesticus*), purchased from an authorized breeder (Agropardal de Almendros S.L., Spain), aged 2.5-3 months old and weighing between 25 and 30 Kg were enrolled in the study. Each pig was housed individually after a one-week acclimation period at our animal care facility (registration number ES280650001166), with a 12h:12h light:dark cycle and room temperature between 20-24 °C. They were fed once daily (127 SAFE, standard diet for pigs, Panlab, Cornella, Spain) and water was provided ad libitum. All animals were considered healthy based on physical examination by the facility's veterinarian.

#### **miRNA isolation from serum**

Total RNA was isolated from 200  $\mu$ l human serum using miRNeasy Serum/Plasma Kit (Qiagen, Hilden, Germany) according to the manufacturer's instructions. In brief, 200  $\mu$ l serum was mixed vigorously for 15 sec with 1 mL QIAzol Lysis reagent (Qiagen, Hilden, Germany) followed by incubation at room temperature for 10 min. 3.5  $\mu$ l of miRNeasy Serum/Plasma Spike-In Control (1.6x10<sup>8</sup> copies/ $\mu$ L of *C. elegans* miR-39) and a 1.2  $\mu$ L of carrier MS2 RNA (0.8  $\mu$ g/ $\mu$ L; Roche, Mannheim, Germany) were added to the serum before starting the isolation procedure for sample normalization. miRNAs were eluted in 15  $\mu$ l of RNase-free water and stored at -80°C until further analysis. To assess the quality and quantity of RNA, samples were measured with a NanoDrop ND-1000 spectrophotometer (NanoDrop Tech, DE, USA). All RNA samples showed A260/280 ratios between 1.9 and 2.1.

### **miRNA cDNA Preparation**

Total RNA including miRNA from each sample was reverse transcribed using the miScript® II Reverse Transcription Kit (Qiagen, Hilden, Germany) as per the manufacturer's protocol. Briefly, a master mix of 3  $\mu$ L of miScript HiSpec Buffer, 1.5  $\mu$ L of miScript Nucleics mix and 1.5  $\mu$ l of miScript Reverse Transcriptase Mix per tube was prepared and distributed to 0.2 mL PCR tubes (Applied Biosystems, Foster City, CA, USA) on ice. 4  $\mu$ l of DNase/RNase free water was added to 5  $\mu$ l of RNA to bring the final volume to 15  $\mu$ L. Samples were incubated at 37°C for 60 minutes and at 95°C for 5 minutes. The reaction mixture was placed on ice and was diluted 10-fold with DNase/RNase free water before amplification. cDNA was stored at -80°C until required.

### **RT-qPCR**

The miScript Primer Assays (Ss\_miR-155-5p, Ss\_miR-146a-5p, Ss\_miR-150-5p, Ss\_miR-21a-5p, Ss\_miR-34a-5p, Ss\_miR-486a-5p, Ss\_miR-133a-3p and Syn-cel-miR-39) were diluted according to the manufacturer's protocol. Quantification of these miRNAs was performed by using miScript PCR System (Qiagen, Hilden, Germany). Briefly, 1.5  $\mu$ L of diluted sample was used for quantitative real-time PCR in a total volume of 15  $\mu$ L using the miScript SYBR Green PCR Kit (Qiagen, Hilden, Germany) and miRNA specific primers on a qPCR machine (Applied Biosystems 7500 Fast Real-Time PCR System, Applied Biosystems, Life Technologies Corporation, Carlsbad, CA, USA). All real-time PCR reactions were performed in triplicate. Syn-cel-miR-39 was used for normalization. A relative fold change in expression of the target gene transcript was determined using the comparative cycle threshold method (2<sup>-DDCT</sup>) using the SDS 1.4.1 software packages.

## **DISCUSSION**

### **Functional roles of the miRNAs studied**

**miR-21a-5p** is implicated in numerous biological processes (40). RAW246.7 cells from BCG infected mouse treated with miR-21a mimic showed decreased expression of TLR4 and MyD88 and decreased cell viability, whereas TNF- $\alpha$ , IL-6 and IL-10 levels, apoptosis and necrosis were increased, suggesting that miR-21a can negatively modulate the TLR4/MyD88 signaling pathway (15). In human studies, high levels were found in 33 patients with late sepsis compared to 18 healthy controls (41). However, miR-21a expression was not different in 70 patients with sepsis and 30 with SIRS (42). Given those results, and the lack of differences among the various groups in our study, whether miR-21a levels are sensitive to the sampling time and to the state of resuscitation is unknown.

**miR-34a-5p** is involved in tumorigenesis (43). Recent studies have implicated miR-34a in the sepsis-induced inflammatory response. In silico analysis revealed that miR-34a impacts the NF- $\kappa$ B signalosome with miR-34a binding sites in 14 key members of the NF- $\kappa$ B signaling pathway. Overexpression of miR-34a in CD4<sup>+</sup> and CD8<sup>+</sup> T cells led to a significant decrease of NFKBIA (as the most downstream cytoplasmic NF- $\kappa$ B) member, and reduced T cell killing capacity (16). LPS-treated HUVEC showed attenuation of LPS-induced effects on TNF- $\alpha$  and NF- $\kappa$ B after treatment with miR-34a lentivirus (17). Our finding of elevated serum expression of miR-34a-5p in sepsis is in line with the results of those in vitro studies and supports its role as a potential biomarker of sepsis.

**miR-133a-3p** has been associated with SIRS, the  $\beta$ 1-adrenergic receptor transduction cascade, and anti-apoptotic and anti-fibrotic effects in mice subject to transaortic constriction (18). As to the role of miR-133 in sepsis, Tacke et al (44) showed an increase of circulating miR-133a and miR-133b in Gram-positive and cecal ligation and puncture induced sepsis in mice. The same group reported in 138 septic patients, 85 critically ill patients without sepsis and 76 healthy controls a higher serum concentration of miR-133a in the septic group (44). In addition, they observed a correlation between these levels and severity and mortality. Unlike this study (44), we have not found a relationship between sepsis and an increase in gene expression of miR-133a-3p. Our results do not allow us to conclude as to miR-133 expression in sepsis, given the below discussed limitations of the present study.

**miR-146a-5p** is associated with anti-inflammatory effects. It provides a negative feedback after initiation of TLR and cytokine signaling by down-regulation of IL-1 receptor-associated kinase 1 and TNF receptor-associated factor 6 protein levels (19). miR-146a serum expression has been shown to be down regulated in 50 patients with sepsis as compared to 30 patients with systemic inflammatory response (SIRS) and 20 healthy controls (28). A subsequent study comparing patients with non-septic SIRS and patients with sepsis (29), found higher gene expression in patients without sepsis. Finally, comparing 40 patients with septic shock, 29 with sepsis and 24 healthy controls, no differences were found in the expression of miR-146a (30). Given those previous results, our findings of high levels in the LoR group and normal levels in the HiR group, allow for the speculation that miR-146a-5p could be a marker of the intensity of resuscitation, being its levels high only if resuscitation is insufficient.

**miR-150-5p** inhibits cell proliferation, blocks the cell cycle and promotes cell apoptosis in pancreatic cancer cells (45); regulates hematopoiesis (46); and participates in the control B and T cell differentiation (20). miR-150-5p expression has been measured in humans with sepsis in different studies (30, 47-50), reporting generally down regulation of its expression. Reduced let-7a and miR-150-5p levels in peripheral leukocytes were measured in patients with gram-negative urological sepsis (50). In a study comparing 138 patients with sepsis and 76 healthy controls, miR-150 serum concentrations were only slightly reduced in critically ill patients compared to healthy controls (49). Levels did not significantly differ in critically ill patients with or without sepsis, but correlated with hepatic or renal dysfunction and mortality (49). Only Puskarich et al (30) reported up-regulation of miR-150 serum expression in patients with sepsis. This discrepancy could be explained by differences in the sampling time. In the cited studies (47-50) serum sampling was from 6 hours to 7 days after admission, whereas in the study by Puskarich et al (30) sampling was within the first 5 hours of ICU admission. Our results of a trend towards increased levels of miR-150-5p in sepsis, and attenuation of that change in the HiR as compared to the LoR group, are in line with the results of Puskarich et al (30) and allow the speculation on the role of this miRNA as a biomarker of resuscitation.

**miR-155-5p** is an oncomiR and targets include regulatory proteins for myelopoiesis and leukemogenesis, inflammation and known tumor suppressors (51). It post-transcriptionally

regulates innate immune signaling pathways (i.e., after TLR stimulation) (21). miR-155 expression was up regulated in 60 patients with sepsis compared to 30 healthy controls, and correlated with disease severity and mortality (31). In our model, in line with Liu et al (31), we found a strong trend toward increased expression of miR-155-5p in sepsis. Also, expression tended to be lower in the HiR versus the LoR groups. As differences did not reach statistical significance, we cannot conclude as to the role of miR-155-5p as a biomarker of sepsis and resuscitation.

**miR-486a-5p** has a tumor-suppressive role. Reduced miR-486a-5p expression is a frequent molecular event in human cancers (52). miR-486a-5p also induces antiapoptotic and antioxidant effects by targeting PTEN y FOXO1 (22). In a study using genome-wide miRNA profiling by microarray in peripheral blood leukocytes, comparing 24 patients with sepsis and 32 healthy controls, it was found that miR-486 (as well as miR-150, miR-182 and miR-342-5p) expression profile was higher in sepsis (47). In another study comparing survivors and non survivors of sepsis, miR-486a-5p was not differentially expressed (53). Measuring expression in serum, we did not find differences in miR-486a-5p expression among the different groups.

**Table S1. Effect of sepsis and resuscitation on hemodynamic variables.**

|                              |                   | Baseline           |                         | Absolute change versus baseline |                         |                         |                         |
|------------------------------|-------------------|--------------------|-------------------------|---------------------------------|-------------------------|-------------------------|-------------------------|
| Groups                       |                   | t=0 h              | t=1 h                   | t=2 h                           | t=3 h                   | t=4 h                   | t=5 h                   |
| Sample size                  | Control           | 15                 | 15                      | 15                              | 15                      | 15                      | 15                      |
|                              | Sepsis 4 mL/Kg/h  | 8                  | 8                       | 7                               | 3                       | 3                       | 3                       |
|                              | Sepsis 10 mL/Kg/h | 8                  | 8                       | 8                               | 8                       | 5                       | 5                       |
|                              | Sepsis 17 mL/Kg/h | 8                  | 8                       | 8                               | 8                       | 8                       | 7                       |
| HR (bpm)                     | Control           | 109 (86 - 144)     | 1 (-9 - 28)             | -6 (-28 - 18)                   | -8 (-25 - 24)           | -13 (-24 - 20)          | -11 (-31 - 19)          |
|                              | Sepsis 4 mL/Kg/h  | 87 (70 - 105)      | 24 (-7 - 74)            | 45 (0 - 72)                     | 4 (2 - NA)              | 19 (6 - NA)             | 19 (-2 - NA)            |
|                              | Sepsis 10 mL/Kg/h | 87 (80 - 99)       | 12 (-7 - 46)            | 23 (10 - 53)                    | 23 (-8 - 53)            | 25 (-8 - 83)            | 14 (-15 - 51)           |
|                              | Sepsis 17 mL/Kg/h | 101 (75 - 109)     | 34 (-15 - 59)           | 29 (-11 - 57)                   | 41 (14 - 62)            | 37 (9 - 51)             | 80 (-6 - 105) *         |
| p value                      |                   | 0.152              | 0.549                   | 0.067                           | 0.104                   | 0.042                   | 0.047                   |
| MAP (mm Hg)                  | Control           | 97 (93 - 104)      | 6 (-2 - 15)             | -2 (-8 - 15)                    | -7 (-11 - 8)            | -10 (-14 - -2)          | -12 (-21 - 2)           |
|                              | Sepsis 4 mL/kg/h  | 98 (91 - 103)      | -21 (-48 - -10) *       | -26 (-39 - -15) *               | -27 (-39 - NA) *        | -22 (-47 - NA)          | -36(-54 - NA)           |
|                              | Sepsis 10 mL/Kg/h | 100 (91 - 113)     | -16 (-29 - 9)           | -11 (-39 - 3) *                 | -33 (-59 - -14)         | -33 (-50 - -14)         | -33 (-56 - 9)           |
|                              | Sepsis 17 mL/Kg/h | 102 (100 - 126)    | -12 (-18 - -9) *        | -32 (-50 - -26) *               | -25 (-44 - -21) *       | -35 (-38 - -24) *       | -28 (-36 - -12)         |
| p value                      |                   | 0.265              | 0.003                   | <0.001                          | <0.001                  | 0.002                   | 0.115                   |
| RAP (mm Hg)                  | Control           | 11.0 (9.0 - 15.0)  | 0.0 (-1.0 - 1.0)        | 1.0 (-1.0 - 1.0)                | 1.0 (0.0 - 1.0)         | -1.0 (-3.0 - 1.0)       | -1.0 (-2.0 - 1.0)       |
|                              | Sepsis 4 mL/Kg/h  | 13.5 (11.0 - 16.8) | -4.5 (-6.5 - 0.5)       | -2.0 (-6.0 - 0.0)               | -6.0 (-7.0 - NA)        | -6.0 (-6.0 - NA) *      | -5.0 (-10.0 - NA)       |
|                              | Sepsis 10 mL/Kg/h | 10.5 (8.5 - 15.5)  | 3.0 (-0.2 - 5.8) *      | 3.5 (-1.0 - 6.5)                | 3.0 (-1.3 - 10.2)       | 4.0 (-0.5 - 9.0) †      | 5.0 (1.0 - 7.5)         |
|                              | Sepsis 17 mL/Kg/h | 12.5 (10.2 - 15.0) | 0.5 (0.0 - 1.0)         | 1.5 (1.0 - 3.5)                 | 2.0 (0.2 - 3.5)         | 1.0 (-0.7 - 4.5)        | 2.0 (1.0 - 3.0)         |
| p value                      |                   | 0.392              | 0.007                   | 0.027                           | 0.093                   | 0.010                   | 0.005                   |
| MPAP (mm Hg)                 | Control           | 25 (22 - 32)       | 0 (-3 - 2)              | -1 (-4 - 7)                     | -1 (-7 - 5)             | -2 (-7 - 4)             | -2 (-7 - 1)             |
|                              | Sepsis 4 mL/Kg/h  | 24 (22 - 29)       | 15 (11 - 17) *          | 24 (17 - 28) *                  | 18 (18 - NA) *          | 21 (19 - NA)            | 22 (22 - NA)            |
|                              | Sepsis 10 mL/Kg/h | 22 (19 - 24)       | 14 (8 - 17) *           | 26 (11 - 35) *                  | 23 (21 - 29) *          | 20 (15 - 28) *          | 16 (11 - 27) *          |
|                              | Sepsis 17 mL/Kg/h | 27 (21 - 28)       | 13 (10 - 18) *          | 18 (13 - 22) *                  | 21 (15 - 26) *          | 22 (12 - 29) *          | 19 (9 - 31)             |
| p value                      |                   | 0.200              | <0.001                  | <0.001                          | 0.001                   | 0.004                   | 0.006                   |
| PAOP (mm Hg)                 | Control           | 13.0 (12.0 - 15.0) | 1.0 (1.0 - 2.0)         | 0.0 (-1.0 - 1.0)                | 0.0 (-1.0 - 1.0)        | 0.0 (0.0 - 0.0)         | 0.0 (0.0 - 1.0)         |
|                              | Sepsis 4 mL/Kg/h  | 15.5 (13.2 - 16.0) | 0.5 (-3.0 - 4.3)        | -1.0 (-2.0 - 0.0)               | 0.0 (-1.0 - NA)         | 0.0 (0.0 - NA)          | 0.0 (0.0 - NA)          |
|                              | Sepsis 10 mL/Kg/h | 12.5 (10.0 - 14.0) | 0.5 (0.0 - 3.2)         | 2.5 (1.2 - 6.0)                 | 2.0 (0.5 - 6.0)         | 1.0 (1.0 - 4.5) *       | 2.0 (-0.5 - 5.5)        |
|                              | Sepsis 17 mL/Kg/h | 15.5 (15.5 - 19.0) | 1.5 (0.0 - 4.5)         | 1.0 (-0.7 - 3.7)                | 2.5 (0.2 - 3.0)         | 4.0 (0.7 - 4.0)         | 4.0 (-2 - 6.0)          |
| p value                      |                   | 0.236              | 0.804                   | 0.180                           | 0.332                   | 0.016                   | 0.337                   |
| SVR (AU)                     | Control           | 650 (507 - 722)    | 106 (19 - 195)          | 104 (-6 - 208)                  | 105 (-60 - 355)         | 192 (-34 - 288)         | 121 (39 - 604)          |
|                              | Sepsis 4 mL/Kg/h  | 659 (571 - 760)    | -75 (-114 - 167)        | 2 (-168 - 106)                  | 168 (-280 - NA)         | 55 (-92 - NA)           | 66 (-37 - NA)           |
|                              | Sepsis 10 mL/Kg/h | 664 (529 - 806)    | -66(-226 - 139)         | -54 (-236 - 135)                | -45 (-313 - 193)        | -257(-310 - 430)        | -105 (-128 - 353)       |
|                              | Sepsis 17 mL/Kg/h | 561 (499 - 768)    | -76 (-231 - 128)        | -140 (-391 - -41) *             | -117 (-356 - 167)       | -32 (-210 - 105)        | 99 (-17 - 244)          |
| p value                      |                   | 0.850              | 0.257                   | 0.031                           | 0.334                   | 0.254                   | 0.487                   |
| PVR (AU)                     | Control           | 97 (75 - 121))     | -12 (-28 - 26)          | 2 (-28 - 23)                    | -6 (-30 - 59)           | 14 (-9 - 76)            | 8 (-4 - 132)            |
|                              | Sepsis 4 mL/Kg/h  | 74 (61 - 82)       | 177 (75 - 267) *        | 270 (198 - 427) *               | 284 (143 - NA)          | 256 (190 - NA)          | 312 (309 - NA)          |
|                              | Sepsis 10 mL/Kg/h | 69 (45 - 78)       | 80 (59 - 135) *         | 247 (117 - 308) *               | 301 (188 - 362) *       | 282 (90 - 392)          | 240 (98 - 378)          |
|                              | Sepsis 17 mL/Kg/h | 68 (59 - 91)       | 81 (54 - 128) *         | 134 (60 - 181) * †              | 141 (72 - 231) *        | 231 (74 - 293) *        | 218 (121 - 307)         |
| p value                      |                   | 0.063              | <0.001                  | <0.001                          | <0.001                  | 0.006                   | 0.008                   |
| Q <sub>207</sub> (mL/kg/min) | Control           | 126 (107 - 165)    | -12 (-33 - 6)           | -24 (-35 - 6)                   | -33 (-67 - 8)           | -32 (-58 - -18)         | -39 (-71 - -20)         |
|                              | Sepsis 4 mL/Kg/h  | 121 (107 - 162)    | -31 (-54 - -19)         | -29 (-100 - 10)                 | -55 (-59 - NA)          | -38 (-62 - NA)          | -50 (-69 - NA)          |
|                              | Sepsis 10 mL/kg/h | 135 (107 - 153)    | -2 (-10 - 9)            | -23 (-37 - -12)                 | -57 (-71 - -28)         | -67 (-128 - 27)         | -66 (-130 - 4)          |
|                              | Sepsis 17 mL/Kg/h | 162 (128 - 192)    | 10 (-60 - 26)           | -23 (-62 - -2)                  | -33 (-85 - -6)          | -61 (-92 - -6)          | -70 (-91 - -27)         |
| p value                      |                   | 0.411              | 0.193                   | 0.792                           | 0.755                   | 0.718                   | 0.746                   |
| SV (mL/kg/min/beat)          | Control           | 1.34 (0.79 - 1.58) | -0.05 (-0.29 - 0.10)    | -0.16 (-0.21 - 0.10)            | -0.14 (-0.27 - -0.03)   | -0.21 (-0.53 - 0.03)    | -0.25 (-0.53 - 0.08)    |
|                              | Sepsis 4 mL/Kg/h  | 1.60 (1.42 - 1.78) | -0.40 (-0.97 - -0.18)   | -0.71 (-1.26 - -0.25)           | -0.71 (-1.27 - NA)      | -0.56 (-1.31 - NA)      | -0.95 (-1.32 - NA)      |
|                              | Sepsis 10 mL/Kg/h | 1.53 (1.24 - 1.76) | -0.17 (-0.53 - 0.13)    | -0.54 (-0.83 - -0.30) *         | -0.81 (-1.05 - -0.38) * | -0.42 (-1.74 - 0.03)    | -0.45 (-1.65 - -0.05)   |
|                              | Sepsis 17 mL/Kg/h | 1.74 (1.49 - 2.04) | -0.43 (-0.49 - -0.29) * | -0.49 (-0.62 - -0.26) *         | -0.79 (-1.00 - -0.44) * | -0.83 (-1.01 - -0.69) * | -0.86 (-1.29 - -0.85) * |
| p value                      |                   | 0.173              | 0.024                   | 0.005                           | 0.012                   | 0.006                   | 0.015                   |

Control, non septic animals. Sepsis groups were resuscitated with 4 mL/Kg/h. 10 mL/Kg/h or 17 mL/Kg/h saline 0.9%. HR, heart rate. MAP, mean arterial pressure. RAP, right atrial pressure. MPAP, mean pulmonary arterial pressure. PAOP, pulmonary artery occlusion pressure. SVR, systemic vascular resistance. PVR, pulmonary vascular resistance. Q<sub>207</sub>, systemic blood flow. VS, stroke volume. p values indicate the overall significance for between group differences (Kruskal Wallis test). \* p < 0.05 versus sepsis 4 mL/Kg/h group (Mann Whitney U test with Holm's correction for multiple comparisons). There were no significant differences between the sepsis 10 mL/kg/h and the sepsis 17 mL/kg/h groups in any of the parameters compared. Values are medians and 25th and 75th percentiles.

**Table S2. Effect of sepsis and resuscitation on biochemical variables.**

|                                        |                   | Baseline              |                         | Absolute change versus baseline |                            |  |
|----------------------------------------|-------------------|-----------------------|-------------------------|---------------------------------|----------------------------|--|
| Groups                                 |                   | t=0 h                 | t=1 h                   | t=3 h                           | t=5 h                      |  |
| Sample size                            | Control           | 15                    | 15                      | 15                              | 15                         |  |
|                                        | Sepsis 4 mL/Kg/h  | 8                     | 8                       | 3                               | 3                          |  |
|                                        | Sepsis 10 mL/kg/h | 8                     | 8                       | 8                               | 5                          |  |
|                                        | Sepsis 17 mL/Kg/h | 8                     | 8                       | 8                               | 7                          |  |
|                                        |                   |                       |                         |                                 |                            |  |
| Creatinine (mg/dL) <sup>a</sup>        | Control           | 0.90 (0.80 - 1.00)    | 0.00 (0.00 - 0.10)      | 0.00 (-0.10 - 0.00)             | 0.00 (-0.10 - 0.01)        |  |
|                                        | Sepsis 4 mL/Kg/h  | 1.00 (0.75 - 1.10)    | 0.20 (0.06 - 0.38)      | 0.40 (0.10 - NA)                | 0.50 (0.10 - NA) *         |  |
|                                        | Sepsis 10 mL/kg/h | 0.95 (0.83 - 1.10)    | 0.00 (-0.10 - 0.18)     | -0.09 (-0.35 - 0.28)            | 0.00 (-0.20 - 0.70)        |  |
|                                        | Sepsis 17 mL/Kg/h | 0.90 (0.80 - 0.98)    | 0.05 (-0.90 - 0.10)     | 0.05 (-0.30 - 0.10)             | 0.20 (0.00 - 0.50)         |  |
|                                        |                   |                       |                         |                                 |                            |  |
| p value                                |                   | 0.380                 | 0.182                   | 0.107                           | 0.042                      |  |
| Arterial lactate (mmol/L) <sup>b</sup> | Control           | 0.9 (0.7 - 1.4)       | 0.0 (0.0 - 0.0)         | 0.0 (-0.5 - 0.2)                | -0.2 (-0.5 - 0.2)          |  |
|                                        | Sepsis 4 mL/Kg/h  | 1.0 (0.8 - 1.1)       | 0.7 (0.0 - 1.7)         | 0.8 (-0.5 - NA)                 | 0.4 (-0.2 - NA)            |  |
|                                        | Sepsis 10 mL/kg/h | 1.2 (0.9 - 1.5)       | 0.0 (-0.1 - 1.4)        | 1.4 (0.1 - 1.6)                 | 3.2 (-0.5 - 3.6) *         |  |
|                                        | Sepsis 17 mL/Kg/h | 1.1 (1.0 - 1.5)       | 0.0 (0.0 - 0.4)         | 0.4 (-0.4 - 1.3)                | 0.1 (-0.1 - 1.1)           |  |
|                                        |                   |                       |                         |                                 |                            |  |
| p value                                |                   | 0.500                 | 0.050                   | 0.036                           | 0.009                      |  |
| Arterial pH <sup>b</sup>               | Control           | 7.410 (7.410 - 7.530) | 0.000 (0.000 - 0.000)   | 0.020 (-0.010 - 0.070)          | 0.030 (-0.030 - 0.100)     |  |
|                                        | Sepsis 4 mL/Kg/h  | 7.480 (7.450 - 7.498) | 0.000 (-0.140 - 0.000)  | -0.180 (-0.300 - NA)            | -0.260 (-0.300 - NA)       |  |
|                                        | Sepsis 10 mL/kg/h | 7.460 (7.440 - 7.503) | -0.005 (-0.058 - 0.000) | -0.070 (-0.120 - -0.023) *      | -0.150 (-0.215 - -0.100) * |  |
|                                        | Sepsis 17 mL/Kg/h | 7.410 (7.335 - 7.510) | 0.000 (-0.063 - 0.000)  | -0.010 (-0.095 - 0.018)         | -0.070 (-0.190 - -0.010) * |  |
|                                        |                   |                       |                         |                                 |                            |  |
| p value                                |                   | 0.315                 | 0.125                   | 0.026                           | 0.001                      |  |
| PaCO2 (mm Hg) <sup>b</sup>             | Control           | 37.0 (34.0 - 45.0)    | -3.0 (-6.0 - 2.0)       | -4.0 (-9.0 - 5.0)               | -5.0 (-8.0 - 4.0)          |  |
|                                        | Sepsis 4 mL/Kg/h  | 36.0 (33.0 - 38.0)    | 1.0 (-4.0 - 3.5)        | -4.0 (-7.0 - NA)                | -1.0 (-5.0 - NA)           |  |
|                                        | Sepsis 10 mL/kg/h | 40.0 (33.0 - 46.0)    | -2.0 (-3.0 - 1.3)       | 2.5 (-4.3 - 3.8)                | 2.0 (1.5 - 7.5)            |  |
|                                        | Sepsis 17 mL/Kg/h | 38.0 (34.0 - 43.0)    | -0.5 (-2.0 - 2.5)       | 2.5 (-0.3 - 3.0)                | 4.0 (-1.0 - 6.0)           |  |
|                                        |                   |                       |                         |                                 |                            |  |
| p value                                |                   | 0.489                 | 0.330                   | 0.466                           | 0.193                      |  |
| PaO2 (mm Hg) <sup>b</sup>              | Control           | 252 (206 - 320)       | 0 (-5 - 0)              | -30 (-50 - -2)                  | -15 (-69 - 12)             |  |
|                                        | Sepsis 4 mL/Kg/h  | 341 (226 - 365)       | -102 (-246 - -42)       | -101 (-160 - NA) *              | -111 (-166 - NA)           |  |
|                                        | Sepsis 10 mL/kg/h | 289 (225 - 337)       | -18 (-88 - 0)           | -118 (-165 - -93) *             | -136 (-196 - -54)          |  |
|                                        | Sepsis 17 mL/Kg/h | 262 (223 - 334)       | 0 (-130 - 0)            | -73 (-255 - 42)                 | -26 (-219 - 8)             |  |
|                                        |                   |                       |                         |                                 |                            |  |
| p value                                |                   | 0.588                 | 0.062                   | 0.009                           | 0.212                      |  |

Legends as in Table S1. a, serum concentration. b, measurements form an arterial blood sample.

**Table S3. Sample size for cytokine and miRNA determinations in the different groups.**

|                              | Control | Sepsis LoR | Sepsis HiR |
|------------------------------|---------|------------|------------|
| <b>Cytokines</b>             |         |            |            |
| IL-1 $\beta$ (serum)         | 6       | 5          | 10         |
| TNF $\alpha$ (serum)         | 6       | 5          | 9          |
| IL-6 (serum)                 | 6       | 6          | 9          |
| IL-1 $\beta$ (renal cortex)  | 6       | 6          | 8          |
| IL-1 $\beta$ (renal medulla) | 6       | 6          | 10         |
| <b>miRNAs</b>                |         |            |            |
| miR-155-5p                   | 6       | 4          | 5          |
| miR-146a-5p                  | 6       | 4          | 5          |
| miR-150-5p                   | 6       | 3          | 5          |
| miR-21a-5p                   | 6       | 3          | 3          |
| miR-34a-5p                   | 6       | 3          | 4          |
| miR-133a-3p                  | 5       | 3          | 5          |
| miR-486a-5p                  | 6       | 3          | 5          |

**Table S4. Effect of sepsis and resuscitation on cytokine concentration.**

| Cytokines (pg/mL)            | Control<br>(n=6)    | Sepsis LoR<br>(n=4)        | Sepsis HiR<br>(n=5)      | p value ‡ |
|------------------------------|---------------------|----------------------------|--------------------------|-----------|
| IL-1 $\beta$ (serum)         | 0                   | 1179.4(492.6 to 2046.6 ) * | 439.7(194.1 to 1223.2) * | 0.001     |
| TNF $\alpha$ (serum)         | 6.8 (5.8-12.9)      | 374.8 (328.5-1535.7) *     | 152.8 (120.2-161.6) * †  | 0.001     |
| IL-6 (serum)                 | 20.5 (8.06-25.1)    | 150.7 (96.6-284.9) *       | 69.06 (50.7-117.4) *     | 0.001     |
| IL-1 $\beta$ (renal cortex)  | 366.5 (268.5-589.2) | 939.7 (778.3-1008.8)       | 801.5 (723.4-952.9) *    | 0.007     |
| IL-1 $\beta$ (renal medulla) | 148.2 (30.4-361.1)  | 945.2 (623.2-1208.1) *     | 589.1 (431.01-869.4) *   | 0.015     |

Legends as in Table S3.



**Table S5. Effect of sepsis and resuscitation on serum miRNA expression.**

| miRNA       | Control             | Sepsis LoR             | Sepsis HiR           | p value ‡ |
|-------------|---------------------|------------------------|----------------------|-----------|
| miR-155-5p  | 0.06 (0.02 - 1.6)   | 21.7 (9.8 - 27.7)      | 4.4 (0.04 - 10.2)    | 0.051     |
| miR-146a-5p | 0.01 (0.006 - 0.05) | 13.80 (6.80 - 23.80) * | 0.60 (0.10 - 0.70) † | 0.010     |
| miR-150-5p  | 0.17 (0.04 - 0.50)  | 3.80 (1.30 - 105.10)   | 0.70 (0.08 - 1.04)   | 0.056     |
| miR-21a-5p  | 0.20 (0.01 - 0.50)  | 1.40 (1.09 - 65.50)    | 0.4 (0.2 - 6.20)     | 0.098     |
| miR-34a-5p  | 0.7 (0.1 - 0.46)    | 2.05 (1.7 - 4.1)       | 2.40 (1.80 - 2.80)   | 0.016     |
| miR-486a-5p | 0.50 (0.10 - 2.40)  | 0.50 (0.30 - 0.80)     | 1.10 (0.40 - 3.30)   | 0.877     |
| miR-133a-3p | 2.10 (1.01 - 4.60)  | 1.50 (0.10 - 2.80)     | 4.4 (0.9 - 11.9)     | 0.891     |

Legends as in Table S3.\* Kruskal Wallis test. (\*) p<0.05 versus control. (†) p<0.05 versus sepsis-LoR (Mann Whitney U test with Holm's correction for multiple comparisons). Values are medians and 25th and 75th percentiles. Units are counts per million copies.



**Table S6. MiRNAs differentially expressed in control versus septic animals: miRNA146-5p and miRNA34a-5p.**

| <b>miR-146a-5p</b>      | <b>p value (uncorrected) *</b> | <b>p value (corrected) †</b> |
|-------------------------|--------------------------------|------------------------------|
| Control - Sepsis LoR    | 0.019                          | 0.048                        |
| Control - Sepsis HiR    | 0.082                          | 0.082                        |
| Sepsis LoR - Sepsis HiR | 0.016                          | 0.048                        |
| <b>miR-34a-5p</b>       |                                |                              |
| Control - Sepsis LoR    | 0.024                          | 0.072                        |
| Control - Sepsis HiR    | 0.024                          | 0.072                        |
| Sepsis LoR - Sepsis HiR | 1.000                          | 1.000                        |

Legends as in Table S3. \* Mann Whitney U test. † Mann Whitney U test with Holm's correction for multiple comparisons.

**Table S7. Pathways targeted by both miRNA34a-5p and miR-146a-5p (KEGG enrichment analysis) (adjusted p<0.01).**

| Pathway                              | Total | Expected | Hits | Pval       | Adjusted p value |
|--------------------------------------|-------|----------|------|------------|------------------|
| Toxoplasmosis                        | 93    | 783      | 24   | 3.77e-7    | 3,77E-05         |
| Pancreatic cancer                    | 69    | 581      | 18   | 0.00000947 | 3,866667E-04     |
| Toll-like receptor signaling pathway | 97    | 817      | 22   | 0.0000116  | 3,866667E-04     |
| Pathways in cancer                   | 310   | 261      | 48   | 0.0000159  | 3,975E-04        |
| Prostate cancer                      | 87    | 732      | 20   | 0.0000236  | 4,72E-04         |
| Chronic myeloid leukemia             | 73    | 615      | 17   | 0.0000815  | 1,358333E-03     |
| HTLV-I infection                     | 199   | 168      | 33   | 0.0000956  | 1,365714E-03     |
| Colorectal cancer                    | 49    | 413      | 13   | 0.000139   | 1,7375E-03       |
| Endometrial cancer                   | 44    | 37       | 12   | 0.000188   | 2,088889E-03     |
| Melanoma                             | 68    | 572      | 15   | 0.000402   | 4,02E-03         |
| Influenza A                          | 107   | 901      | 20   | 0.000488   | 4,125E-03        |
| TGF-beta signaling pathway           | 84    | 707      | 17   | 0.000495   | 4,125E-03        |
| MAPK signaling pathway               | 265   | 223      | 38   | 0.000635   | 4,884615E-03     |
| Acute myeloid leukemia               | 57    | 48       | 13   | 0.000693   | 4,95E-03         |
| Glioma                               | 65    | 547      | 14   | 0.000805   | 5,16875E-03      |
| Small cell lung cancer               | 80    | 674      | 16   | 0.000827   | 5,16875E-03      |
| Non-small cell lung cancer           | 52    | 438      | 12   | 0.000991   | 5,829412E-03     |
| Focal adhesion                       | 200   | 168      | 30   | 0.00114    | 6,052632E-03     |
| T cell receptor signaling pathway    | 98    | 825      | 18   | 0.00115    | 6,052632E-03     |
| Apoptosis                            | 83    | 699      | 16   | 0.00125    | 6,142857E-03     |
| Epstein-Barr virus infection         | 91    | 766      | 17   | 0.00129    | 6,142857E-03     |
| Cell cycle                           | 124   | 104      | 21   | 0.00137    | 6,227273E-03     |
| Measles                              | 102   | 859      | 18   | 0.00184    | 8E+00            |
| Bladder cancer                       | 29    | 244      | 8    | 0.00207    | 8,625E-03        |



**Table S8. Proteins in our network participating in the Toll-like receptor and in the toxoplasmosis pathways. In red, proteins common to both pathways.**

| <b>Toll-like receptor pathway</b> | <b>Toxoplasmosis pathway</b> |
|-----------------------------------|------------------------------|
| AKT2                              | CASP8                        |
| BIRC3                             | CD40                         |
| CASP8                             | CD86                         |
| CD40                              | CXCL10                       |
| CD40LG                            | CXCL8                        |
| CYCS                              | FOS                          |
| GNAI2                             | IFNB1                        |
| HSPA1A                            | IL6                          |
| HSPA2                             | IRAK1                        |
| IRAK1                             | IRF3                         |
| ITGA6                             | IRF7                         |
| LAMB3                             | JUN                          |
| LAMC2                             | MAP2K2                       |
| LAMC3                             | MAP2K7                       |
| MAP3K7                            | MAP3K7                       |
| MAPK3                             | MAPK3                        |
| NFKB1                             | NFKB1                        |
| PIK3CA                            | PIK3CA                       |
| PIK3CG                            | PIK3CG                       |
| PIK3R2                            | PIK3R2                       |
| SOCS1                             | STAT1                        |
| STAT1                             | TAB2                         |
| TAB2                              |                              |
| TNFRSF1A                          |                              |

**Table S9. Enrichment analysis (KEGG) of proteins in the Toll-like receptor pathway (STRING) (adjusted p value<0.0000001).**

| #term ID | term description                                     | observed<br>gene count | background<br>gene count | strength | false disco-<br>very rate |
|----------|------------------------------------------------------|------------------------|--------------------------|----------|---------------------------|
| hsa04620 | Toll-like receptor signaling pathway                 | 21                     | 102                      | 226      | 3,24E-42                  |
| hsa05167 | Kaposi's sarcoma-associated herpesvirus infection    | 17                     | 183                      | 192      | 1,41E-26                  |
| hsa05161 | Hepatitis B                                          | 14                     | 142                      | 194      | 3,61E-21                  |
| hsa05164 | Influenza A                                          | 14                     | 168                      | 187      | 2,53E-20                  |
| hsa04668 | TNF signaling pathway                                | 12                     | 108                      | 199      | 3,06E-18                  |
| hsa05142 | Chagas disease (American trypanosomiasis)            | 11                     | 101                      | 199      | 2,26E-16                  |
| hsa04621 | NOD-like receptor signaling pathway                  | 12                     | 166                      | 181      | 2,92E-16                  |
| hsa04380 | Osteoclast differentiation                           | 11                     | 124                      | 19       | 1,43E-15                  |
| hsa05162 | Measles                                              | 11                     | 133                      | 187      | 2,64E-15                  |
| hsa04657 | IL-17 signaling pathway                              | 10                     | 92                       | 199      | 8,98E-15                  |
| hsa05168 | Herpes simplex infection                             | 11                     | 181                      | 173      | 5,51E-14                  |
| hsa04660 | T cell receptor signaling pathway                    | 9                      | 99                       | 191      | 2,05E-12                  |
| hsa05145 | Toxoplasmosis                                        | 9                      | 109                      | 187      | 4,31E-12                  |
| hsa05169 | Epstein-Barr virus infection                         | 10                     | 194                      | 166      | 7,82E-12                  |
| hsa04622 | RIG-I-like receptor signaling pathway                | 8                      | 70                       | 201      | 1,4E-11                   |
| hsa05140 | Leishmaniasis                                        | 8                      | 70                       | 201      | 1,4E-11                   |
| hsa05160 | Hepatitis C                                          | 9                      | 131                      | 179      | 1,59E-11                  |
| hsa05133 | Pertussis                                            | 8                      | 74                       | 198      | 1,77E-11                  |
| hsa04933 | AGE-RAGE signaling pathway in diabetic complications | 8                      | 98                       | 186      | 1,39E-10                  |
| hsa04722 | Neurotrophin signaling pathway                       | 8                      | 116                      | 179      | 4,78E-10                  |
| hsa04926 | Relaxin signaling pathway                            | 8                      | 130                      | 174      | 1,09E-09                  |
| hsa04917 | Prolactin signaling pathway                          | 7                      | 69                       | 196      | 1,16E-09                  |

|          |                                        |    |     |     |          |
|----------|----------------------------------------|----|-----|-----|----------|
| hsa04210 | Apoptosis                              | 8  | 135 | 172 | 1,33E-09 |
| hsa04662 | B cell receptor signaling pathway      | 7  | 71  | 194 | 1,33E-09 |
| hsa05200 | Pathways in cancer                     | 11 | 515 | 128 | 1,6E-09  |
| hsa04010 | MAPK signaling pathway                 | 9  | 293 | 144 | 1,1E-08  |
| hsa05203 | Viral carcinogenesis                   | 8  | 183 | 159 | 1,17E-08 |
| hsa05165 | Human papillomavirus infection         | 9  | 317 | 14  | 2,02E-08 |
| hsa04623 | Cytosolic DNA-sensing pathway          | 6  | 62  | 193 | 5,4E-08  |
| hsa05418 | Fluid shear stress and atherosclerosis | 7  | 133 | 167 | 6,68E-08 |



| Table S10. Enrichment analysis (Reactome) of proteins in the Toll-like receptor pathway (STRING) (adjusted p value<0.001). |                                                      |                     |                       |          |                      |
|----------------------------------------------------------------------------------------------------------------------------|------------------------------------------------------|---------------------|-----------------------|----------|----------------------|
| #term ID                                                                                                                   | term description                                     | observed gene count | background gene count | strength | false discovery rate |
| HSA-1280215                                                                                                                | Cytokine Signaling in Immune system                  | 5                   | 328                   | 113      | 2,6E-04              |
| HSA-1059683                                                                                                                | Interleukin-6 signaling                              | 2                   | 11                    | 221      | 4,2E-04              |
| HSA-109582                                                                                                                 | Hemostasis                                           | 5                   | 591                   | 88       | 9,7E-04              |
| HSA-1168372                                                                                                                | Downstream signaling events of B Cell Receptor (BCR) | 2                   | 22                    | 191      | 9,7E-04              |
| HSA-1257604                                                                                                                | PIP3 activates AKT signaling                         | 3                   | 118                   | 135      | 9,7E-04              |

**Table S11. Enrichment analysis (Gene-Ontology Biological Process) of proteins in the Toll-like receptor pathway (STRING) (adjusted p value<0.0000001).**

| #term ID   | term description                                           | observed gene count | background gene count | strength | false discovery rate |
|------------|------------------------------------------------------------|---------------------|-----------------------|----------|----------------------|
| GO:0002684 | positive regulation of immune system process               | 19                  | 882                   | 128      | 7,37E-18             |
| GO:0034097 | response to cytokine                                       | 19                  | 1035                  | 121      | 7,28E-17             |
| GO:0019221 | cytokine-mediated signaling pathway                        | 16                  | 655                   | 134      | 1,04E-14             |
| GO:0050776 | regulation of immune response                              | 17                  | 873                   | 124      | 1,04E-14             |
| GO:0009967 | positive regulation of signal transduction                 | 19                  | 1493                  | 105      | 2,26E-14             |
| GO:0048584 | positive regulation of response to stimulus                | 20                  | 2054                  | 94       | 1,01E-13             |
| GO:0002764 | immune response-regulating signaling pathway               | 13                  | 365                   | 15       | 2,99E-13             |
| GO:0071310 | cellular response to organic substance                     | 20                  | 2219                  | 9        | 3,76E-13             |
| GO:0010033 | response to organic substance                              | 21                  | 2815                  | 82       | 5,9E-13              |
| GO:1902533 | positive regulation of intracellular signal transduction   | 16                  | 959                   | 117      | 8,49E-13             |
| GO:0051173 | positive regulation of nitrogen compound metabolic process | 21                  | 2946                  | 8        | 1,21E-12             |
| GO:0050778 | positive regulation of immune response                     | 14                  | 589                   | 133      | 1,58E-12             |
| GO:0009966 | regulation of signal transduction                          | 21                  | 3033                  | 79       | 1,96E-12             |
| GO:0031325 | positive regulation of cellular metabolic process          | 21                  | 3060                  | 79       | 2,22E-12             |
| GO:0010604 | positive regulation of macromolecule metabolic process     | 21                  | 3081                  | 78       | 2,43E-12             |
| GO:0048583 | regulation of response to stimulus                         | 22                  | 3882                  | 7        | 3,1E-12              |
| GO:1902531 | regulation of intracellular signal transduction            | 18                  | 1764                  | 96       | 6,88E-12             |
| GO:0032103 | positive regulation of response to external stimulus       | 13                  | 499                   | 136      | 6,99E-12             |
| GO:0007166 | cell surface receptor signaling pathway                    | 19                  | 2198                  | 89       | 7,22E-12             |
| GO:0051707 | response to other organism                                 | 16                  | 1173                  | 108      | 1,01E-11             |
| GO:0035556 | intracellular signal transduction                          | 17                  | 1528                  | 10       | 1,58E-11             |
| GO:0002376 | immune system process                                      | 19                  | 2370                  | 85       | 2,28E-11             |
| GO:0038095 | Fc-epsilon receptor signaling pathway                      | 8                   | 64                    | 205      | 3,47E-11             |
| GO:0032496 | response to lipopolysaccharide                             | 11                  | 298                   | 152      | 3,75E-11             |
| GO:0007165 | signal transduction                                        | 22                  | 4738                  | 62       | 1,37E-10             |
| GO:1901701 | cellular response to oxygen-containing compound            | 14                  | 896                   | 114      | 2,02E-10             |
| GO:0006950 | response to stress                                         | 20                  | 3267                  | 74       | 2,15E-10             |

|            |                                                                         |    |      |     |          |
|------------|-------------------------------------------------------------------------|----|------|-----|----------|
| GO:0048522 | positive regulation of cellular process                                 | 22 | 4898 | 6   | 2,61E-10 |
| GO:0031349 | positive regulation of defense response                                 | 11 | 365  | 143 | 2,76E-10 |
| GO:0032101 | regulation of response to external stimulus                             | 14 | 955  | 112 | 4,32E-10 |
| GO:0051704 | multi-organism process                                                  | 18 | 2514 | 8   | 1,56E-09 |
| GO:0010557 | positive regulation of macromolecule biosynthetic process               | 16 | 1758 | 91  | 3,02E-09 |
| GO:0045935 | positive regulation of nucleobase-containing compound metabolic process | 16 | 1770 | 91  | 3,28E-09 |
| GO:1901700 | response to oxygen-containing compound                                  | 15 | 1427 | 97  | 3,36E-09 |
| GO:0043900 | regulation of multi-organism process                                    | 12 | 653  | 121 | 3,37E-09 |
| GO:0045893 | positive regulation of transcription, DNA-templated                     | 15 | 1435 | 97  | 3,49E-09 |
| GO:0051246 | regulation of protein metabolic process                                 | 18 | 2668 | 78  | 3,72E-09 |
| GO:0002757 | immune response-activating signal transduction                          | 10 | 332  | 143 | 3,85E-09 |
| GO:0031347 | regulation of defense response                                          | 12 | 676  | 12  | 4,58E-09 |
| GO:0031328 | positive regulation of cellular biosynthetic process                    | 16 | 1846 | 89  | 5,36E-09 |
| GO:0051239 | regulation of multicellular organismal process                          | 18 | 2788 | 76  | 7,04E-09 |
| GO:0002753 | cytoplasmic pattern recognition receptor signaling pathway              | 6  | 32   | 222 | 7,06E-09 |
| GO:0006952 | defense response                                                        | 14 | 1234 | 10  | 9,02E-09 |
| GO:0071222 | cellular response to lipopolysaccharide                                 | 8  | 146  | 169 | 9,41E-09 |
| GO:0001819 | positive regulation of cytokine production                              | 10 | 390  | 136 | 1,49E-08 |
| GO:0043902 | positive regulation of multi-organism process                           | 10 | 394  | 135 | 1,57E-08 |
| GO:0080134 | regulation of response to stress                                        | 14 | 1299 | 98  | 1,59E-08 |
| GO:0002768 | immune response-regulating cell surface receptor signaling pathway      | 9  | 266  | 148 | 1,86E-08 |
| GO:0002833 | positive regulation of response to biotic stimulus                      | 9  | 277  | 146 | 2,61E-08 |
| GO:0001932 | regulation of protein phosphorylation                                   | 14 | 1370 | 96  | 3,07E-08 |
| GO:0002831 | regulation of response to biotic stimulus                               | 10 | 426  | 132 | 3,07E-08 |
| GO:0001817 | regulation of cytokine production                                       | 11 | 615  | 12  | 3,63E-08 |
| GO:0014070 | response to organic cyclic compound                                     | 12 | 873  | 109 | 6,07E-08 |

**Table S12. Enrichment analysis (KEGG) of proteins in the toxoplasmosis pathway (STRING) (adjusted p value<0.0000001).**

| #term ID | term description                                  | observed gene count | background gene count | strength | false discovery rate |
|----------|---------------------------------------------------|---------------------|-----------------------|----------|----------------------|
| hsa05145 | Toxoplasmosis                                     | 22                  | 109                   | 222      | 1,01E-42             |
| hsa04620 | Toll-like receptor signaling pathway              | 11                  | 102                   | 194      | 2,78E-15             |
| hsa05222 | Small cell lung cancer                            | 10                  | 92                    | 195      | 9,51E-14             |
| hsa04668 | TNF signaling pathway                             | 10                  | 108                   | 188      | 3,23E-13             |
| hsa05200 | Pathways in cancer                                | 14                  | 515                   | 135      | 4,7E-13              |
| hsa04380 | Osteoclast differentiation                        | 10                  | 124                   | 182      | 7,97E-13             |
| hsa05162 | Measles                                           | 10                  | 133                   | 179      | 1,33E-12             |
| hsa05165 | Human papillomavirus infection                    | 12                  | 317                   | 149      | 1,93E-12             |
| hsa05142 | Chagas disease (American trypanosomiasis)         | 9                   | 101                   | 186      | 8,93E-12             |
| hsa05164 | Influenza A                                       | 10                  | 168                   | 169      | 8,93E-12             |
| hsa05167 | Kaposi's sarcoma-associated herpesvirus infection | 10                  | 183                   | 165      | 1,79E-11             |
| hsa05169 | Epstein-Barr virus infection                      | 10                  | 194                   | 162      | 2,87E-11             |
| hsa04210 | Apoptosis                                         | 9                   | 135                   | 174      | 7,4E-11              |
| hsa04064 | NF-kappa B signaling pathway                      | 8                   | 93                    | 185      | 3,07E-10             |
| hsa04510 | Focal adhesion                                    | 9                   | 197                   | 157      | 1,67E-09             |
| hsa04917 | Prolactin signaling pathway                       | 7                   | 69                    | 192      | 3,39E-09             |
| hsa01524 | Platinum drug resistance                          | 7                   | 70                    | 191      | 3,51E-09             |
| hsa04151 | PI3K-Akt signaling pathway                        | 10                  | 348                   | 137      | 5,28E-09             |
| hsa05161 | Hepatitis B                                       | 8                   | 142                   | 166      | 5,67E-09             |
| hsa05152 | Tuberculosis                                      | 8                   | 172                   | 158      | 2,34E-08             |
| hsa04660 | T cell receptor signaling pathway                 | 7                   | 99                    | 176      | 2,82E-08             |
| hsa04010 | MAPK signaling pathway                            | 9                   | 293                   | 14       | 3,52E-08             |
| hsa04071 | Sphingolipid signaling pathway                    | 7                   | 116                   | 169      | 7,4E-08              |

Table S13. Enrichment analysis (Reactome) of proteins in the toxoplasmosis pathway (STRING) (adjusted p value<0.001).

| #term ID   | term description | observed gene count | background gene count | strength | false discovery rate |
|------------|------------------|---------------------|-----------------------|----------|----------------------|
| HSA-109582 | Hemostasis       | 6                   | 591                   | 92       | 7,9E-04              |

**Table S14. Enrichment analysis (Gene-Ontology Biological Process) of proteins in the toxoplasmosis pathway (STRING) (adjusted p value<0.0000001).**

| #term ID   | term description                                           | observed<br>gene count | background<br>gene count | strength | false discovery rate |
|------------|------------------------------------------------------------|------------------------|--------------------------|----------|----------------------|
| GO:0035556 | intracellular signal transduction                          | 18                     | 1528                     | 98       | 1,99E-10             |
| GO:0050790 | regulation of catalytic activity                           | 19                     | 2249                     | 84       | 2,57E-09             |
| GO:0070887 | cellular response to chemical stimulus                     | 20                     | 2672                     | 79       | 2,57E-09             |
| GO:0071310 | cellular response to organic substance                     | 19                     | 2219                     | 84       | 2,57E-09             |
| GO:0010033 | response to organic substance                              | 20                     | 2815                     | 76       | 3,29E-09             |
| GO:0032268 | regulation of cellular protein metabolic process           | 19                     | 2486                     | 79       | 5,33E-09             |
| GO:0043085 | positive regulation of catalytic activity                  | 16                     | 1381                     | 98       | 5,33E-09             |
| GO:0044093 | positive regulation of molecular function                  | 17                     | 1713                     | 91       | 5,33E-09             |
| GO:0050776 | regulation of immune response                              | 14                     | 873                      | 112      | 5,33E-09             |
| GO:0051173 | positive regulation of nitrogen compound metabolic process | 20                     | 2946                     | 74       | 5,33E-09             |
| GO:0031325 | positive regulation of cellular metabolic process          | 20                     | 3060                     | 73       | 7,47E-09             |
| GO:0010604 | positive regulation of macromolecule metabolic process     | 20                     | 3081                     | 72       | 7,81E-09             |
| GO:0032270 | positive regulation of cellular protein metabolic process  | 16                     | 1496                     | 94       | 8,37E-09             |
| GO:1902533 | positive regulation of intracellular signal transduction   | 14                     | 959                      | 108      | 8,37E-09             |
| GO:0019221 | cytokine-mediated signaling pathway                        | 12                     | 655                      | 117      | 4,15E-08             |
| GO:0002684 | positive regulation of immune system process               | 13                     | 882                      | 108      | 5,2E-08              |
| GO:0031347 | regulation of defense response                             | 12                     | 676                      | 116      | 5,36E-08             |

|            |                                                 |    |      |    |          |
|------------|-------------------------------------------------|----|------|----|----------|
| GO:0031399 | regulation of protein modification process      | 16 | 1747 | 87 | 5,51E-08 |
| GO:1902531 | regulation of intracellular signal transduction | 16 | 1764 | 87 | 6,09E-08 |
| GO:0042221 | response to chemical                            | 21 | 4153 | 62 | 6,2E-08  |
| GO:0042325 | regulation of phosphorylation                   | 15 | 1465 | 92 | 7,21E-08 |
| GO:0048522 | positive regulation of cellular process         | 22 | 4898 | 56 | 7,21E-08 |
| GO:0007166 | cell surface receptor signaling pathway         | 17 | 2198 | 8  | 8,46E-08 |
| GO:0009967 | positive regulation of signal transduction      | 15 | 1493 | 91 | 8,46E-08 |
| GO:0042981 | regulation of apoptotic process                 | 15 | 1501 | 91 | 8,73E-08 |

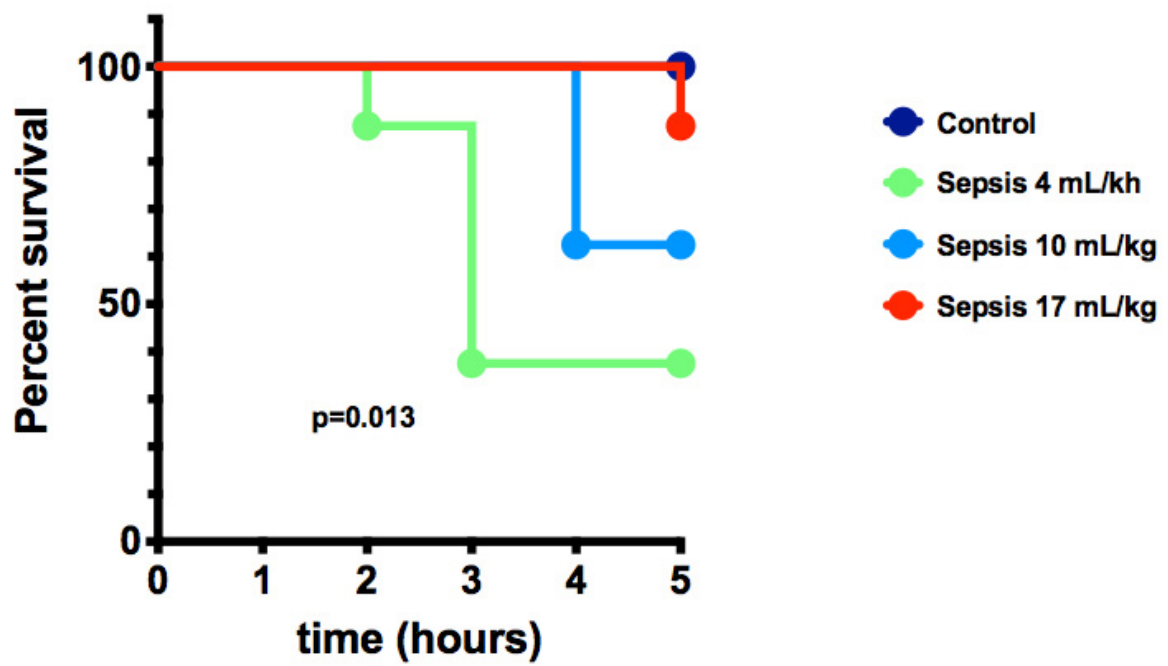

**Figure S1.** Mortality of the different experimental groups (control, n=15; sepsis 4 ml/kg/h, n=8; sepsis 10 ml/kg/h, sepsis 17 ml/kg/h).



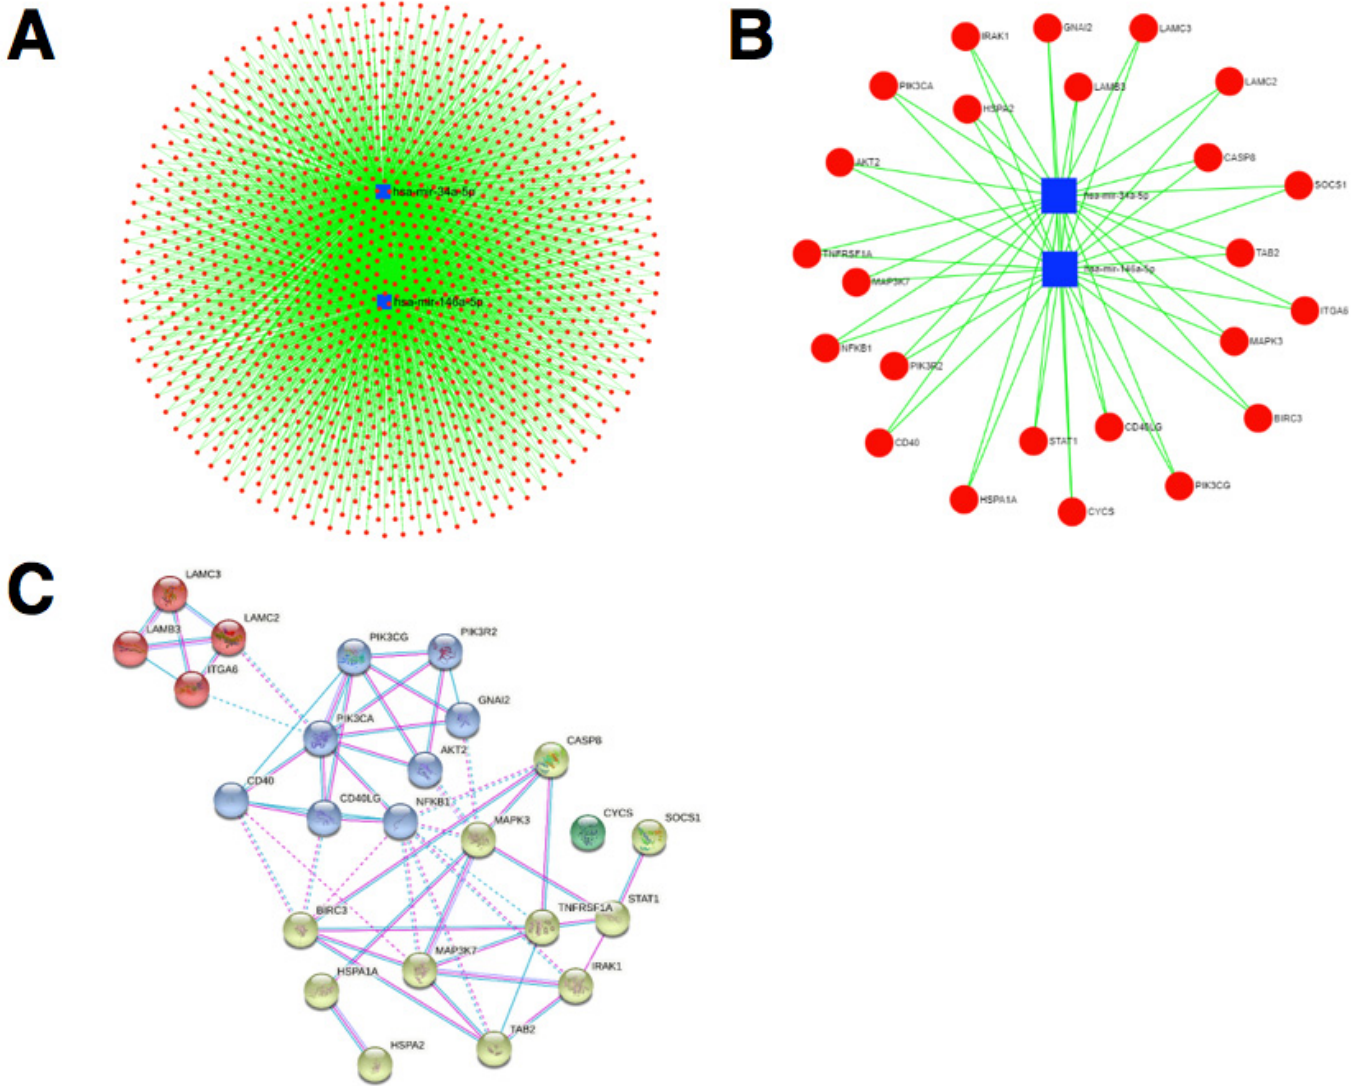

**Figure S2. Panel A:** Genes targeted by both miRNAs of interest (miRNA146a-5p and miRNA34a-5p) (mir-Net); 1386 genes were identified as regulated by both miRNAs. **Panel B:** Toxoplasmosis as the most highly significant pathway regulated by the miRNAs of interest (KEGG enrichment analysis), with 24 hits (adjusted p value =  $3.77 \times 10^{-5}$ ) of which 10 were common with the Toll-like receptor signaling pathway. **Panel C:** Protein-protein interaction of the 24 proteins (STRING, confidence 0.9, in 4 clusters). PPI enrichment p-value:  $< 1.0 \times 10^{-16}$ . Purple line, experimental evidence. Light blue line, database evidence. Dotted lines, interactions appearing only after clustering.
